# Supplementary material
Source: Springer Nature journal article supplement (https://www.springermedizin.de/resource/supplementary/12865_2009_279_MOESM4_ESM.pdf/9427662)

**A.****Pre-expansion**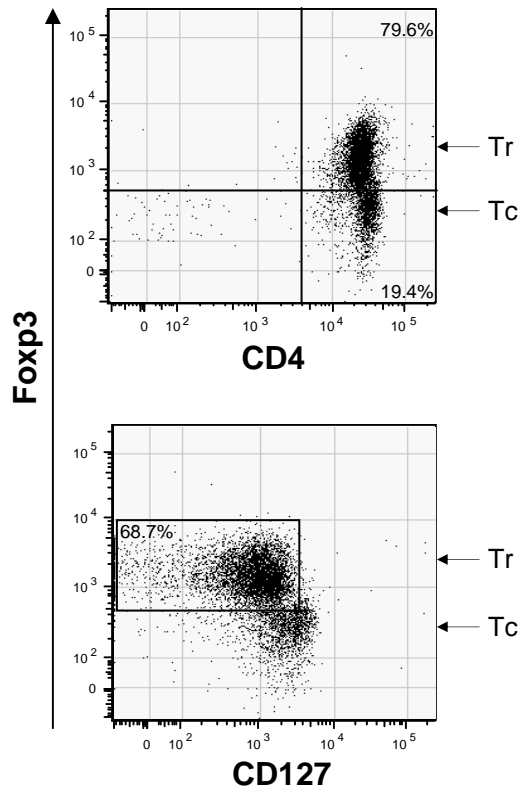**B.****Post-expansion**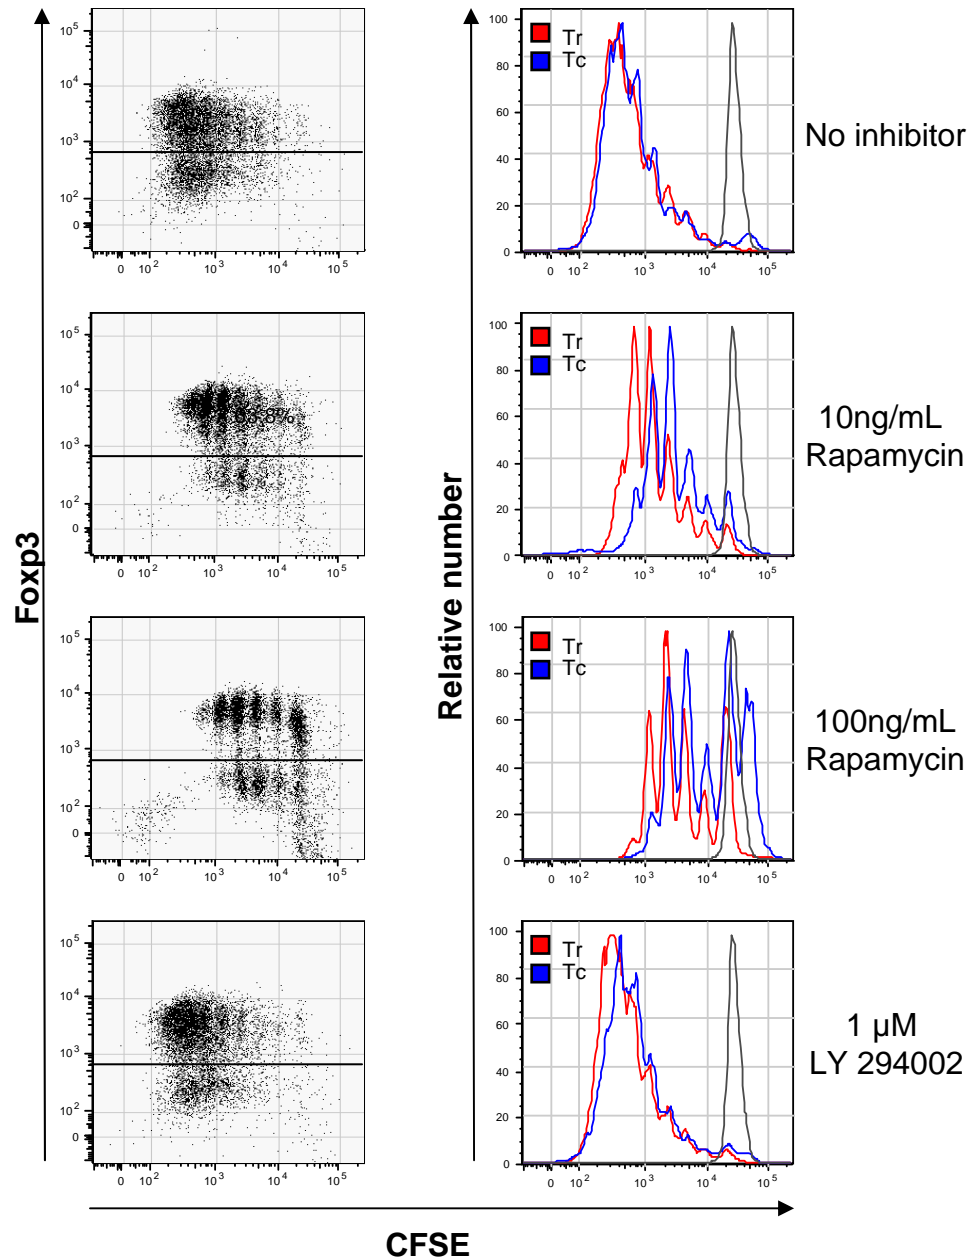

Supplement: MOESM4 [file 9427662]
